# Supplementary material
Source: PubMed Central journal article supplement (PMC6082631)
Supplement: NIHMS973564-supplement-1.pdf [file NIHMS973564-supplement-1.pdf]

**Supplementary Information**  
**Histidine catabolism is a major determinant of methotrexate sensitivity**

Naama Kanarek<sup>1,2,3,4</sup>, Heather R. Keys<sup>1</sup>, Jason R. Cantor<sup>1,2,3,4</sup>, Caroline A. Lewis<sup>1</sup>, Sze Ham Chan<sup>1</sup>,  
Tenzin Kunchok<sup>1</sup>, Monther Abu-Remaileh<sup>1,2,3,4</sup>, Elizaveta Freinkman<sup>1</sup>, Lawrence D. Schweitzer<sup>4</sup> and  
David M. Sabatini<sup>1,2,3,4\*</sup>

<sup>1</sup>Whitehead Institute for Biomedical Research and Massachusetts Institute of Technology, Department of Biology, 455 main Street, Cambridge, Massachusetts 02142, USA. <sup>2</sup>Howard Hughes Medical Institute, Department of Biology, Massachusetts Institute of Technology, Cambridge, Massachusetts 02139, USA. <sup>3</sup>Koch Institute for Integrative Cancer Research and Massachusetts Institute of Technology, Department of Biology, 77 Massachusetts Avenue, Cambridge, Massachusetts 02139, USA. <sup>4</sup>Broad Institute of Harvard and Massachusetts Institute of Technology, 415 main Street, Cambridge, Massachusetts 02142, USA.

\*Correspondence: [sabatini@wi.mit.edu](mailto:sabatini@wi.mit.edu)

### **Source Data\_1**

Sheet “barcoded cell lines” contains the list of genomically-barcoded cell lines alongside with their individual barcodes, presented in Fig. 1a and Extended Data Fig. 1a-c.

Sheet “Counts\_sequencing” contains the sequencing raw data of the results presented in Extended Data Fig. 1b.

Sheet “CRISPR score” contains the CRISPR scores for all genes that passed quality control in the CRISPR/Cas9-based screen presented in Fig. 1b, Extended Data Fig. 1d,e.

Sheet “Screen rpm” contains reads per million (rpm) per sgRNA used in the CRISPR/Cas9-based screen presented in Fig. 1b, Extended Data Fig. 1d,e.

Sheet “Survival MTX” contains the raw data of the survival assays that generated the EC90 presented in Fig. 1f.

### **Source Data\_2**

This file contains the source data for Fig. 2 and Extended Data Fig. 2, 3

### **Source Data\_3**

Sheet “Survival MTX” contains the raw data of the survival assays that generated the EC90 presented in Fig. 3a.

Sheet “metabolite profiling” contains the source data for Fig. 3b-d and Extended Data Fig. 4 c-f.

Sheet “cell lines survival” contains the raw data for the survival assays that generated the EC90 presented in Fig. 3g.

Sheet “HAL KO survival” contains the raw data for the survival assays that generated the EC90 presented in Fig. 3h.

Sheet “ALL patients contains the raw data for Fig. 3i and Extended Data Fig. 5 b-d.

### **Source Data\_4**

This file contains the source data for Fig. 4 and Extended Data Fig. 8-9

### **Source Data\_5**

This file contains the source data for Extended Data Fig. 10.

# Supplementary Figure 1

## 5-formyl THF

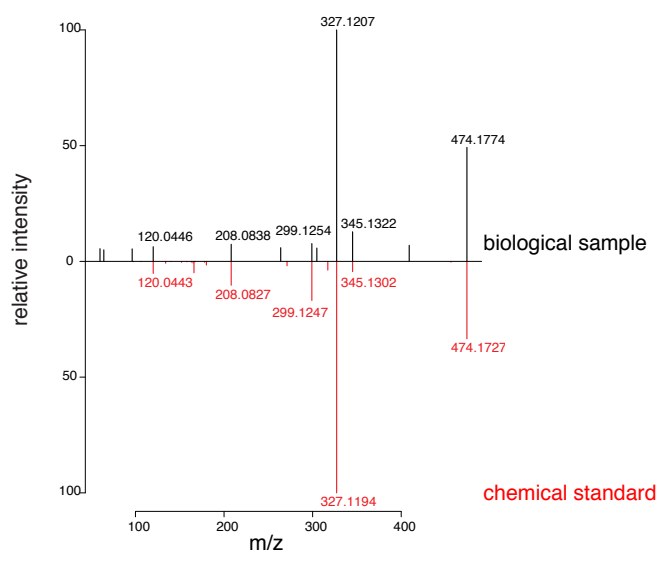

| theoretical <i>m/z</i> | proposed chemical formula                                                  | proposed structure |
|------------------------|----------------------------------------------------------------------------|--------------------|
| 120.0444               | C <sub>7</sub> H <sub>6</sub> NO <sup>+</sup>                              |                    |
| 208.0829               | C <sub>8</sub> H <sub>10</sub> N <sub>5</sub> O <sub>2</sub> <sup>+</sup>  |                    |
| 299.1251               | C <sub>14</sub> H <sub>15</sub> N <sub>6</sub> O <sub>2</sub> <sup>+</sup> |                    |
| 327.1200               | C <sub>15</sub> H <sub>15</sub> N <sub>6</sub> O <sub>3</sub> <sup>+</sup> |                    |
| 345.1306               | C <sub>15</sub> H <sub>17</sub> N <sub>6</sub> O <sub>4</sub> <sup>+</sup> |                    |
| 474.1732 (parental)    | C <sub>20</sub> H <sub>24</sub> N <sub>7</sub> O <sub>7</sub> <sup>+</sup> |                    |

## 5-methyl THF

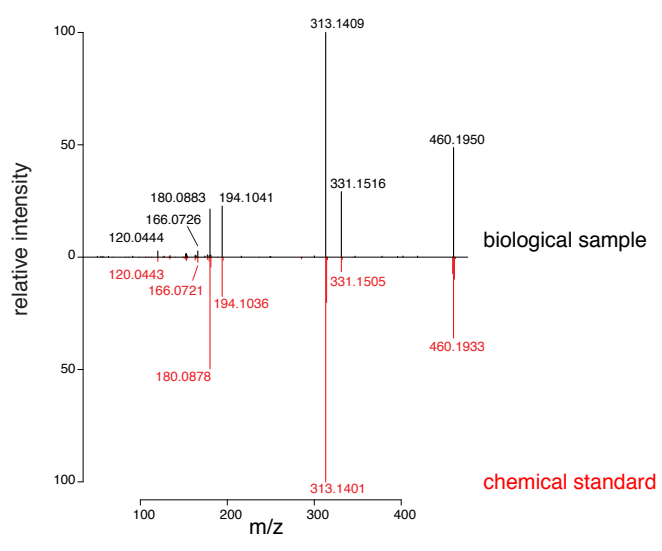

| theoretical <i>m/z</i> | proposed chemical formula                                                  | proposed structure |
|------------------------|----------------------------------------------------------------------------|--------------------|
| 120.0444               | C <sub>7</sub> H <sub>6</sub> NO <sup>+</sup>                              |                    |
| 166.0723               | C <sub>8</sub> H <sub>8</sub> N <sub>5</sub> O <sup>+</sup>                |                    |
| 180.0880               | C <sub>7</sub> H <sub>10</sub> N <sub>5</sub> O <sup>+</sup>               |                    |
| 194.1036               | C <sub>8</sub> H <sub>12</sub> N <sub>5</sub> O <sup>+</sup>               |                    |
| 313.1408               | C <sub>15</sub> H <sub>17</sub> N <sub>6</sub> O <sub>2</sub> <sup>+</sup> |                    |
| 331.1513               | C <sub>15</sub> H <sub>19</sub> N <sub>6</sub> O <sub>3</sub> <sup>+</sup> |                    |
| 460.1939 (parental)    | C <sub>20</sub> H <sub>26</sub> N <sub>7</sub> O <sub>6</sub> <sup>+</sup> |                    |

## 5,10-methenyl THF

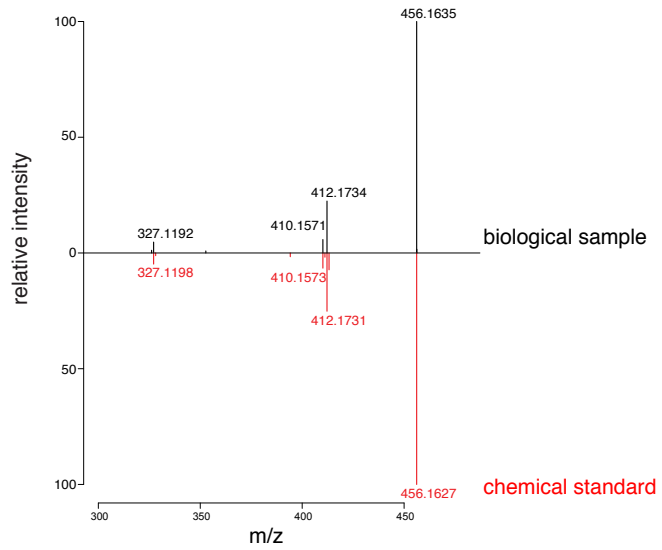

| theoretical <i>m/z</i> | proposed chemical formula                                                  | proposed structure |
|------------------------|----------------------------------------------------------------------------|--------------------|
| 327.1200               | C <sub>15</sub> H <sub>15</sub> N <sub>6</sub> O <sub>3</sub> <sup>+</sup> |                    |
| 412.1728               | C <sub>19</sub> H <sub>22</sub> N <sub>7</sub> O <sub>4</sub> <sup>+</sup> |                    |
| 456.1626 (parental)    | C <sub>20</sub> H <sub>22</sub> N <sub>7</sub> O <sub>6</sub> <sup>+</sup> |                    |

## folate

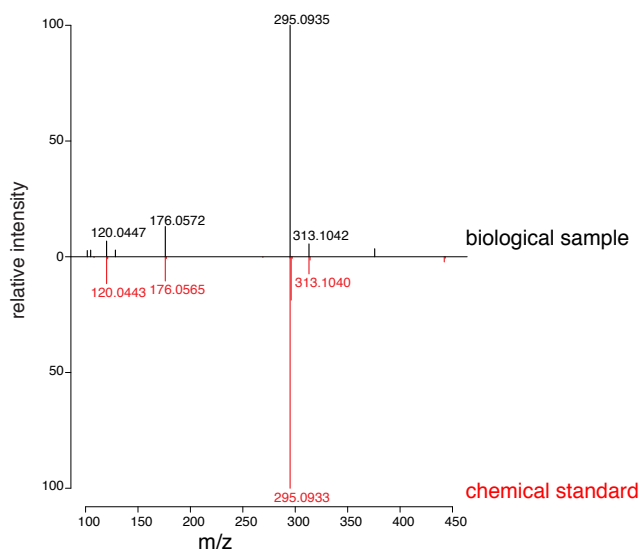

| theoretical $m/z$   | proposed chemical formula | proposed structure |
|---------------------|---------------------------|--------------------|
| 120.0444            | $C_7H_8NO^+$              |                    |
| 176.0567            | $C_7H_8N_5O^+$            |                    |
| 295.0938            | $C_{14}H_{11}N_6O_2^+$    |                    |
| 313.1044            | $C_{14}H_{13}N_6O_3^+$    |                    |
| 442.1470 (parental) | $C_{19}H_{20}N_7O_6^+$    |                    |

## THF

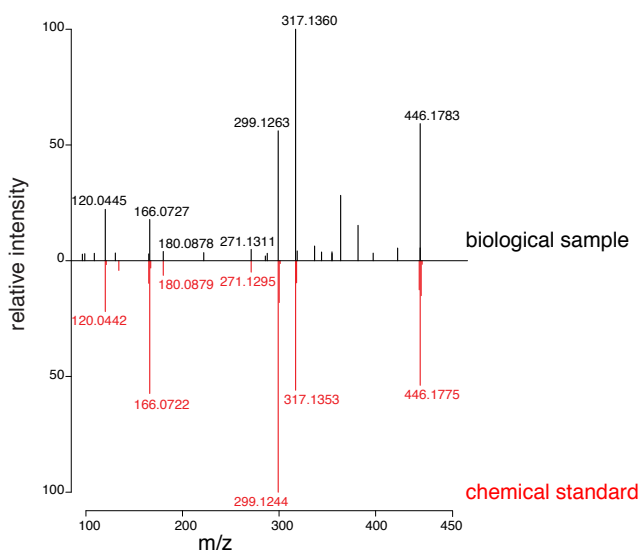

| theoretical $m/z$   | proposed chemical formula | proposed structure |
|---------------------|---------------------------|--------------------|
| 120.0444            | $C_7H_8NO^+$              |                    |
| 166.0723            | $C_6H_8N_5O^+$            |                    |
| 180.0880            | $C_7H_{10}N_5O^+$         |                    |
| 271.1302            | $C_{13}H_{15}N_6O^+$      |                    |
| 299.1251            | $C_{14}H_{15}N_6O_2^+$    |                    |
| 317.1357            | $C_{14}H_{17}N_6O_3^+$    |                    |
| 446.1783 (parental) | $C_{19}H_{24}N_7O_6^+$    |                    |

### Supplementary Figure 1.

Mirror plots showing experimental MS2 spectra from a synthetic chemical standard for each folate species described in this paper (red), aligned with the corresponding folate species from a biological sample (black). The adjacent table contains the proposed structure, proposed chemical formula, and corresponding theoretical  $m/z$  for each of the major fragments annotated in the mirror plot. Mirror plots were created using R and structures were identified based on the known parental structure (HMDB [www.hmdb.ca](http://www.hmdb.ca)), using a combination of ChemDraw (Perkin Elmer, Waltham, MA), CFM:ID<sup>35</sup> ([cfmid.wishartlab.com](http://cfmid.wishartlab.com)), METLIN ([www.metlin.scripps.edu](http://www.metlin.scripps.edu)) and Sirius<sup>36,37</sup> (version 3.5.1; University of Jena, Germany).



# Supplementary Figure 2

## HEL cell-derived tumor xenografts

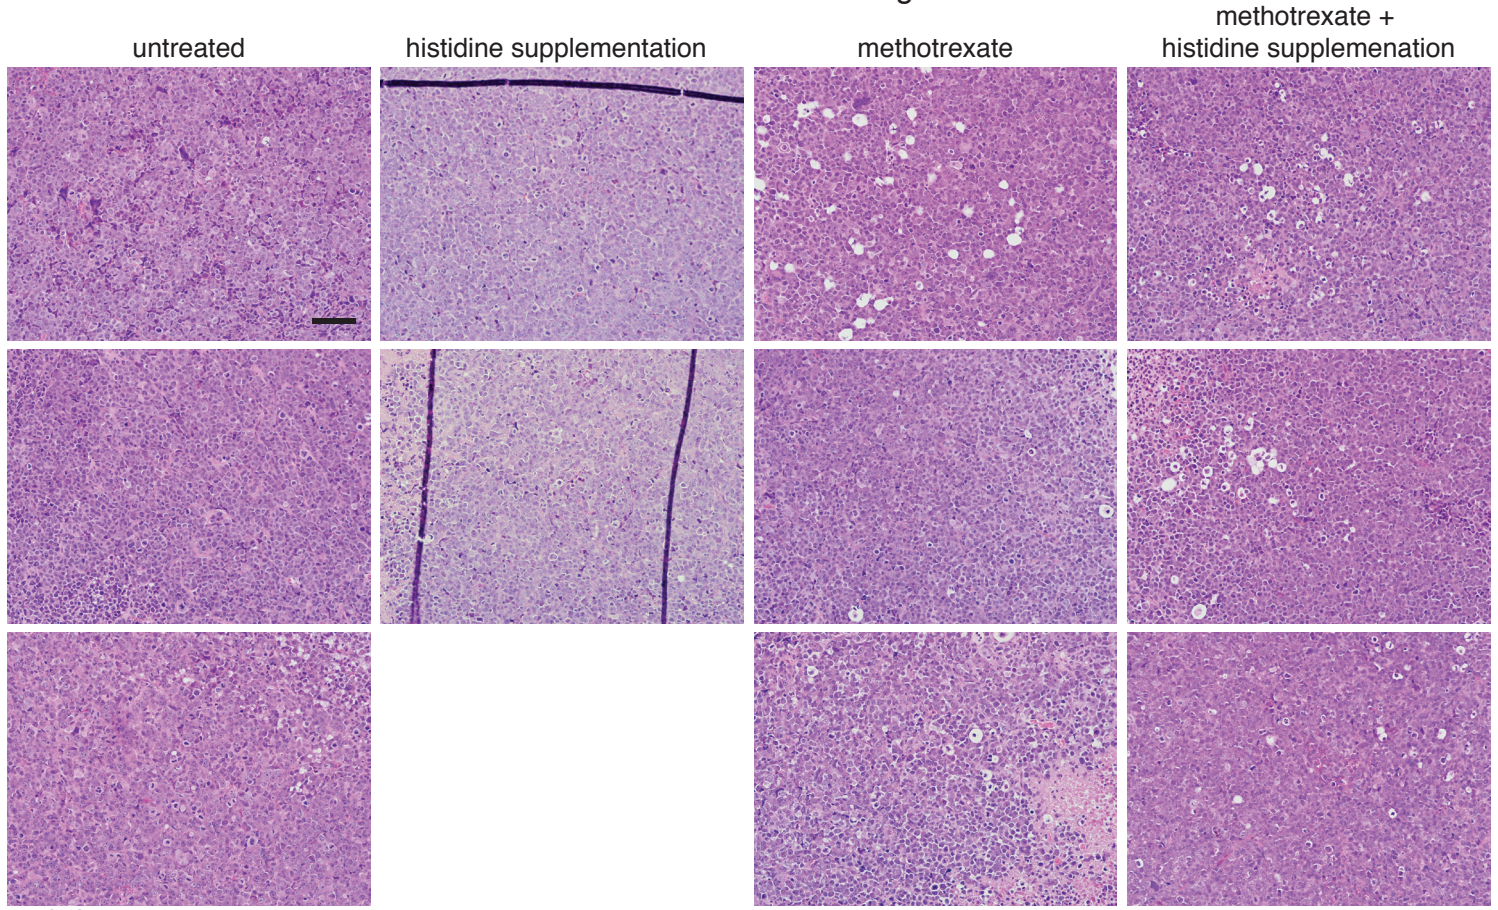

scale bar = 50  $\mu$ m

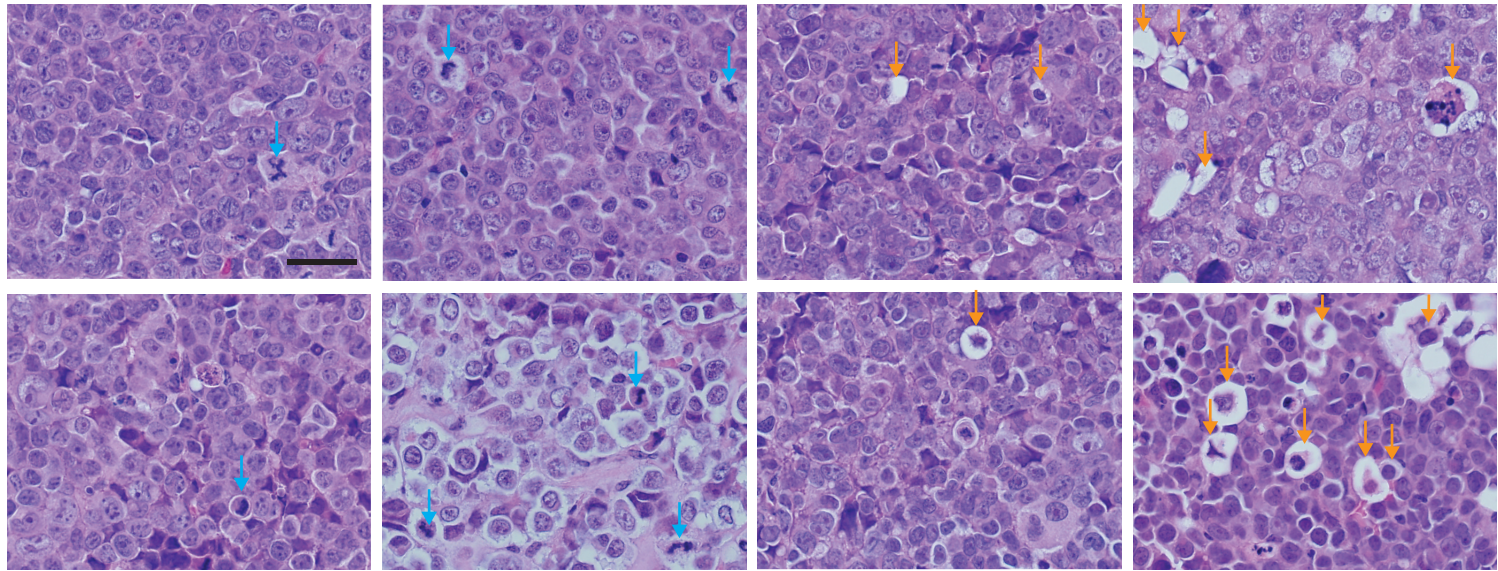

scale bar = 20  $\mu$ m

→ mitotic cells  
→ apoptotic or necrotic cells

**Supplementary Figure 2.** Additional images of H&E analyses of HEL cell-derived tumor sections from mice presented in Fig.4.



# Supplementary Figure 3

## a Kidneys from mice with HEL cell-derived tumor xenografts - long term regime

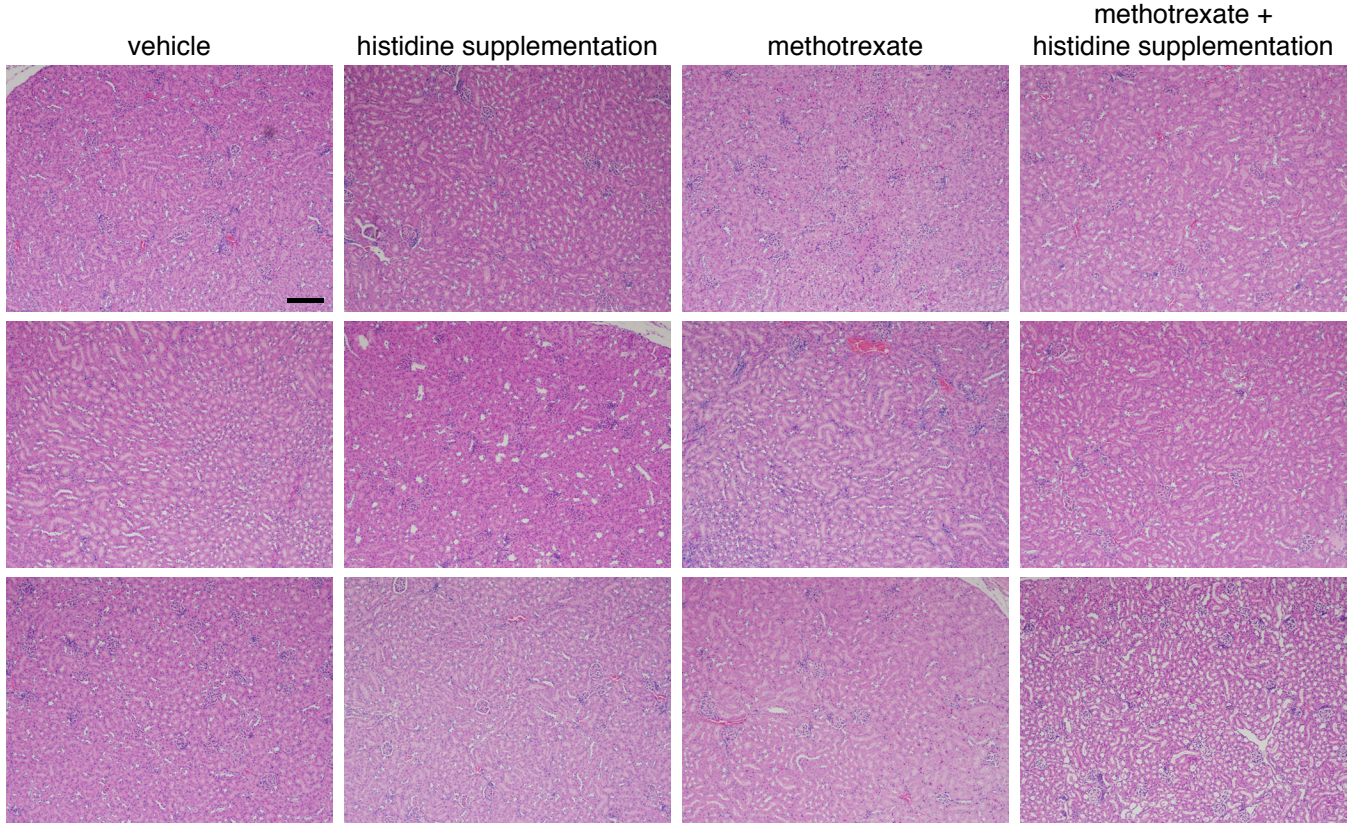

## b Intestines from mice with SEM cell-derived tumor xenografts

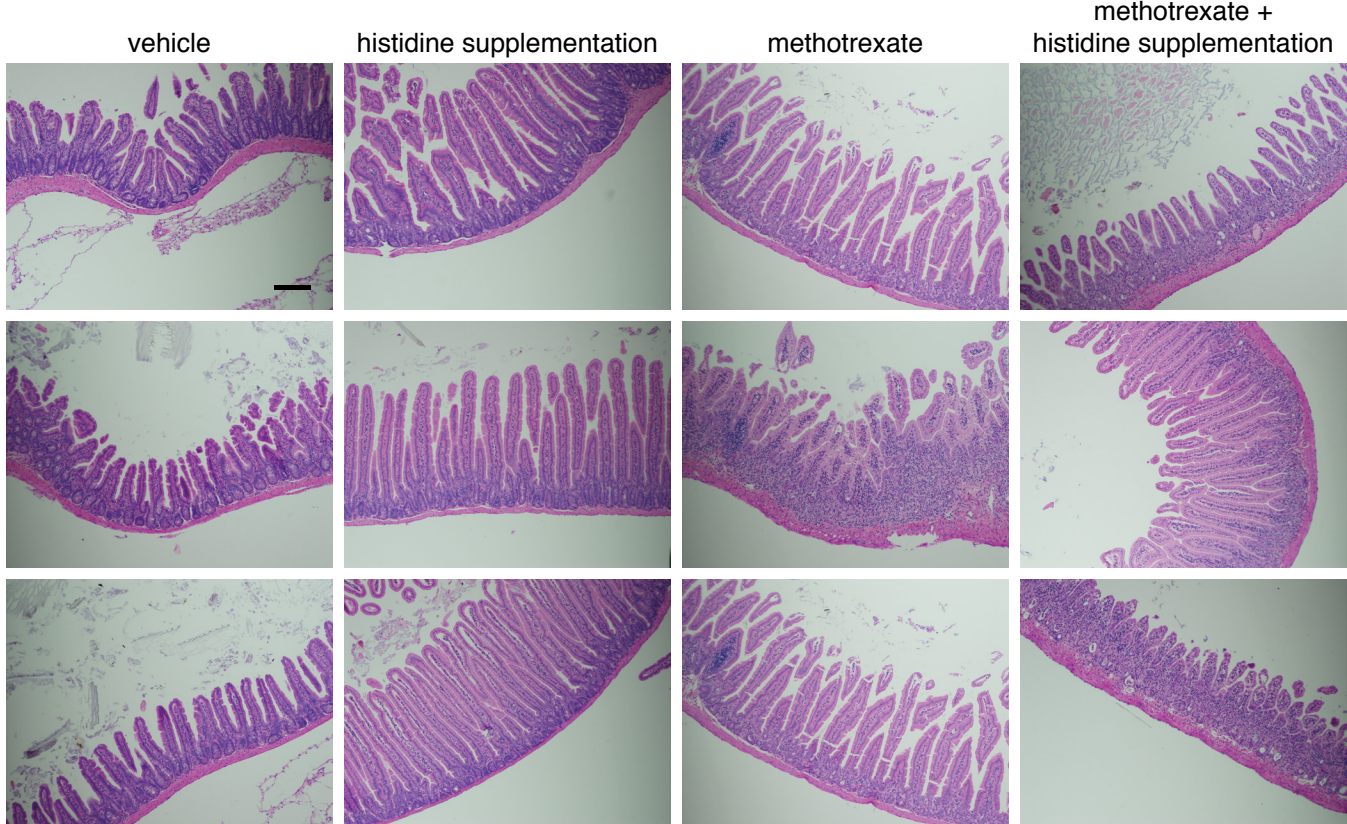

### Supplementary Figure 3.

- a. H&E analyses of kidneys from mice bearing HEL cell-derived tumors presented in Fig. 4.
- b. H&E analyses of intestines from mice bearing SEM cell-derived tumors presented in figure 4.
